# Supplementary material
Source: PubMed Central journal article supplement (PMC9796615)
Supplement: CEA-52-1169-s002.pdf [file CEA-52-1169-s002.pdf]

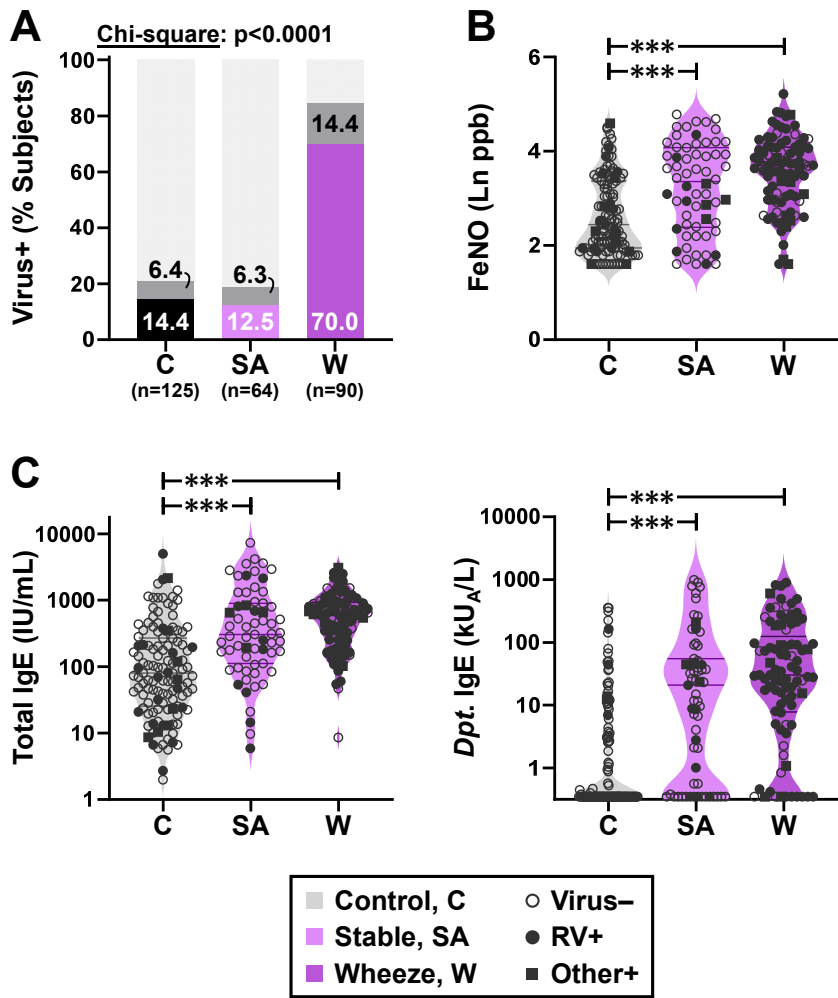

Fig. S1

### Th1/Th17 Cytokines

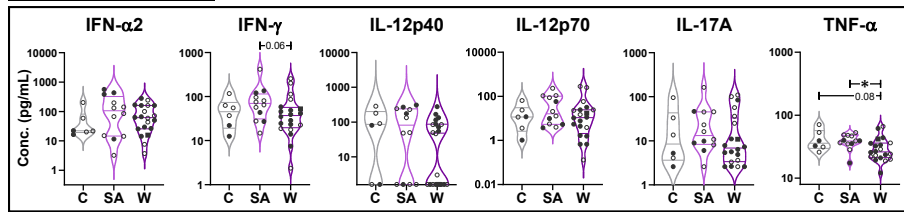

### Other Anti-Viral Mediators

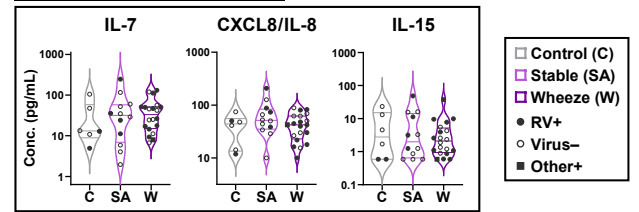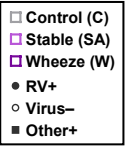

### Th2 Cytokines

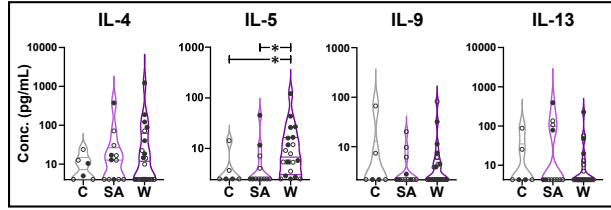

### Type 1 Chemoattractants

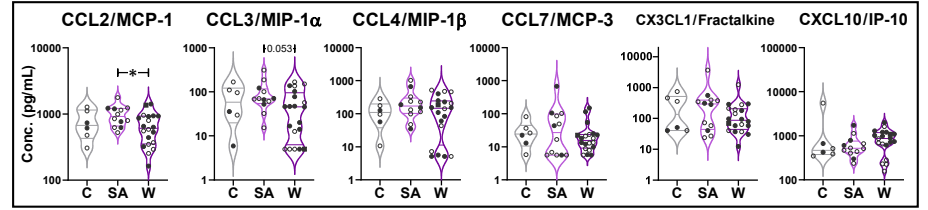

### Type 2 Chemoattractants

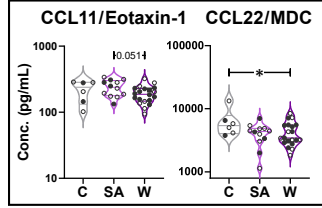

### Growth Factors

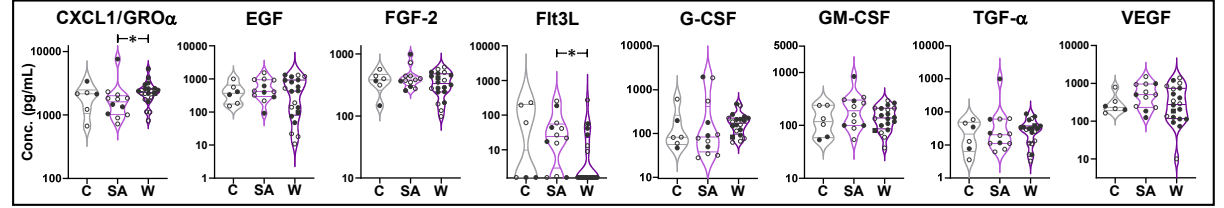

### Pro-Inflammatory Factors

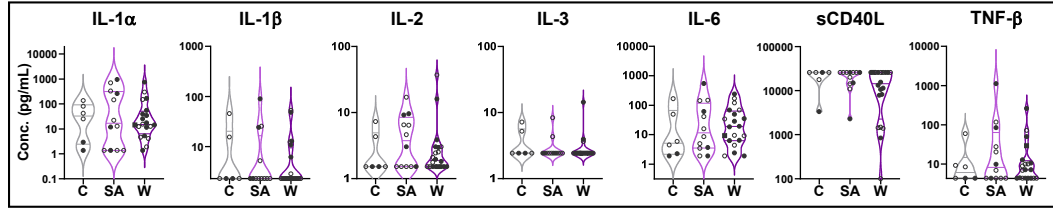

### Immune Regulation

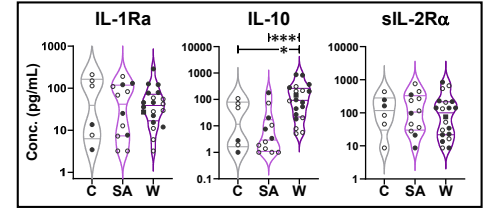

Fig. S2

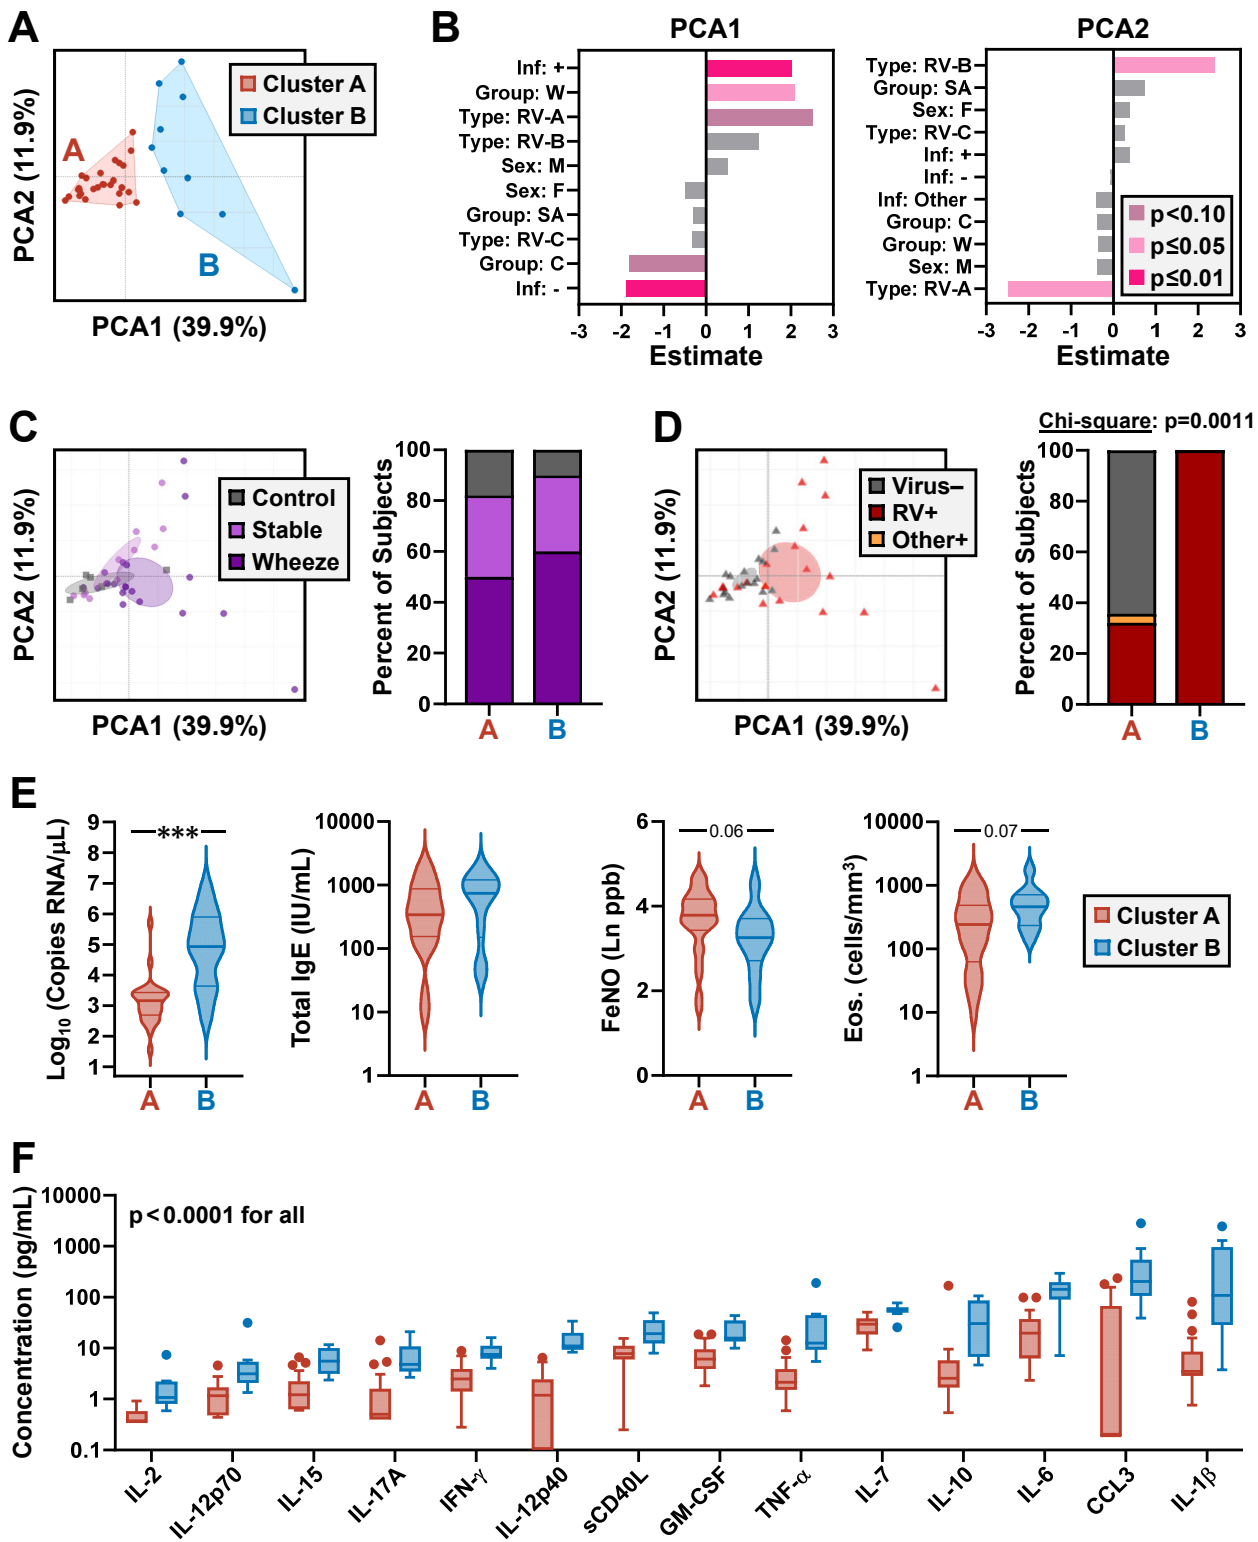

Fig. S3

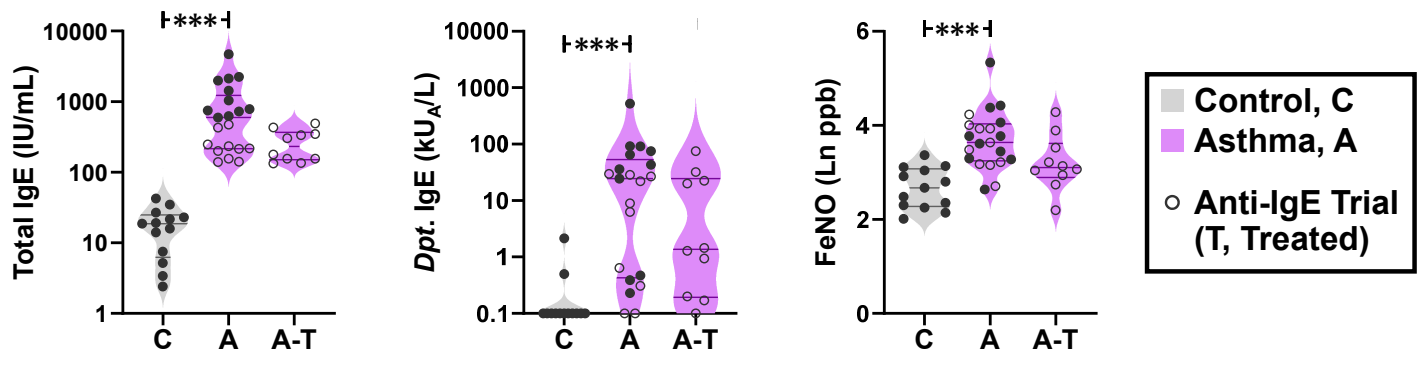

Fig. S4

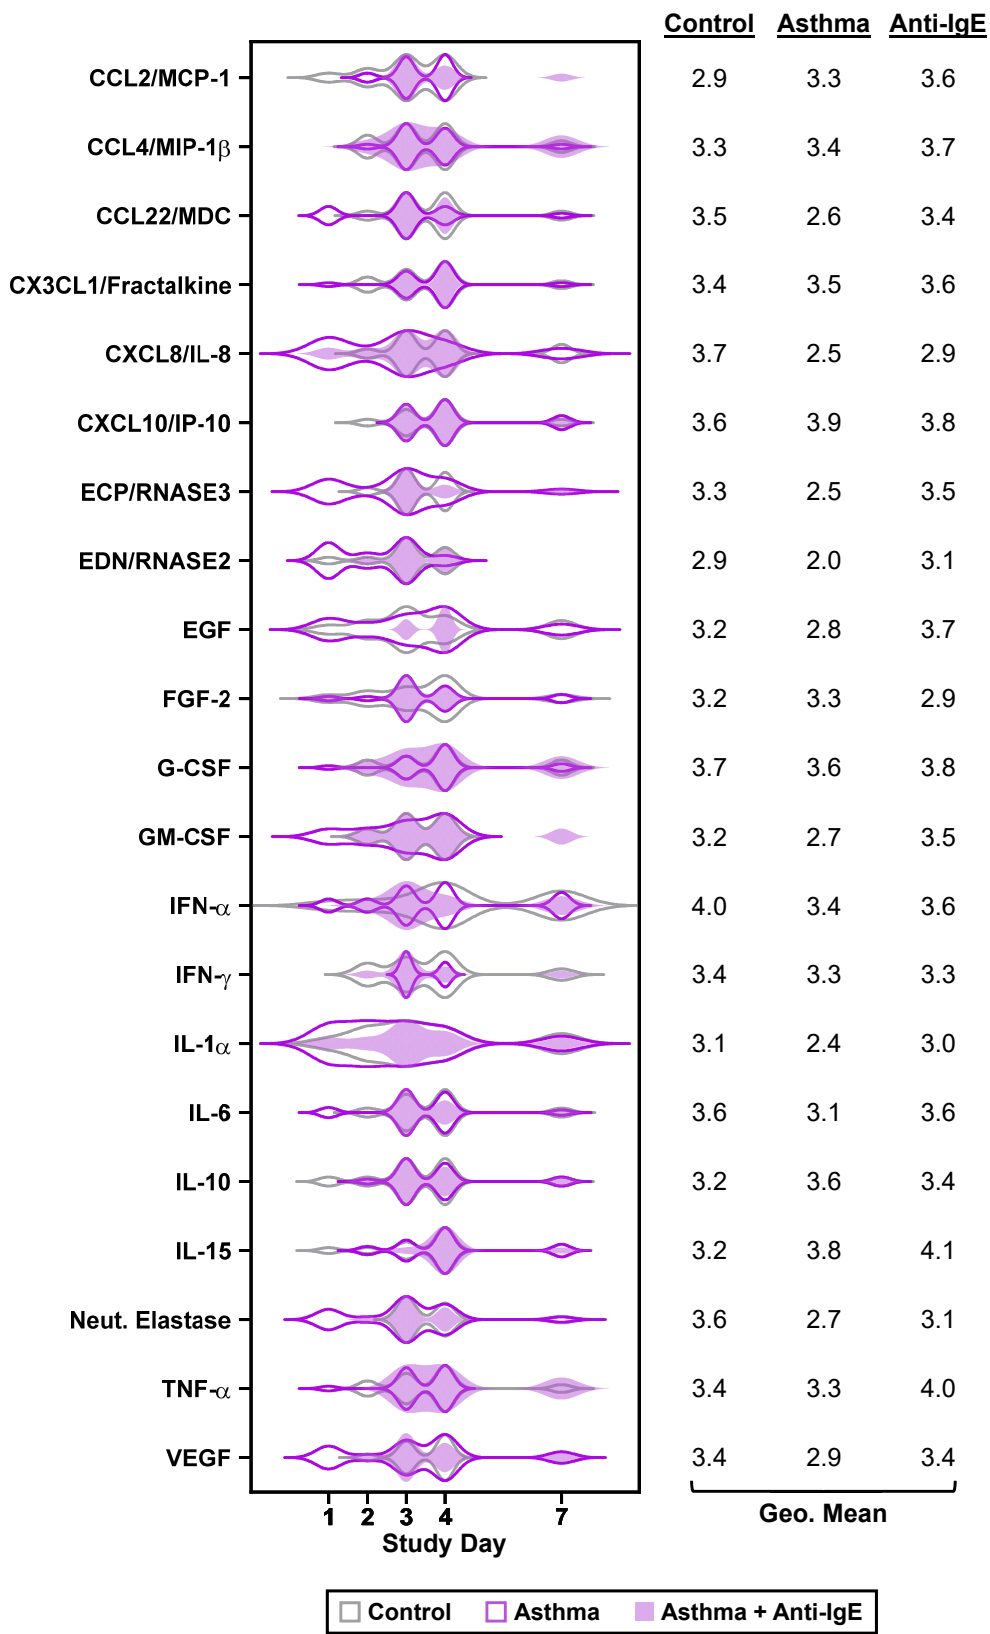

Fig. S5

### Children: Whole Cohort Nasal Wash (7-plex)

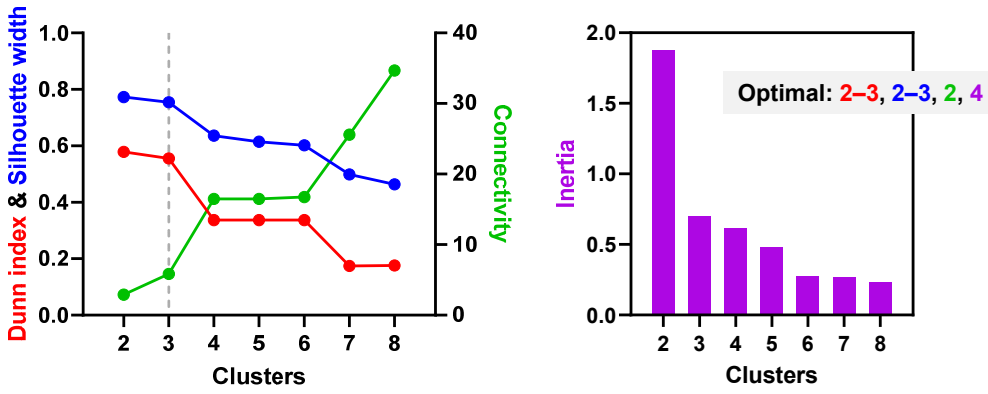

### Children: Limited Cohort Nasal Wash (39-plex)

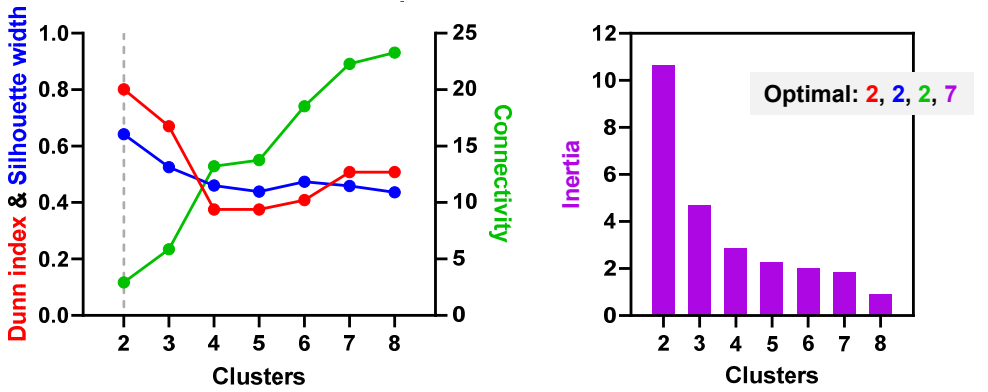

### Adults: Peak RV Infection Nasal Wash (18-plex)

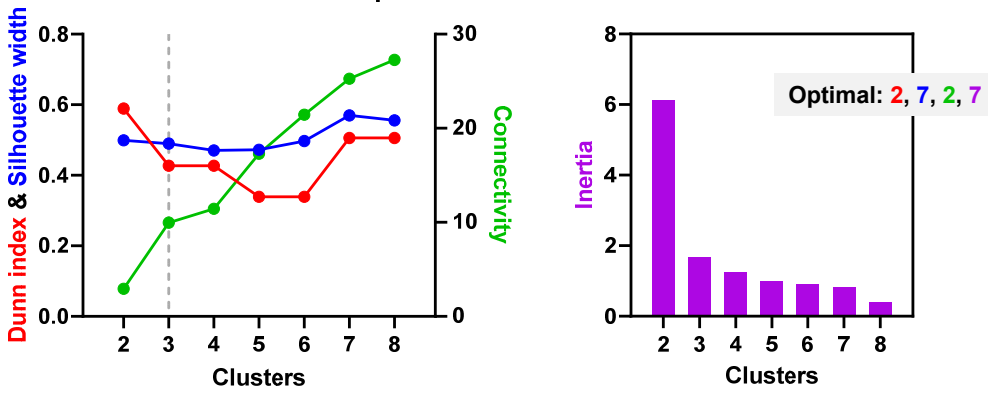

Fig. S6
